# Supplementary material
Source: PubMed Central journal article supplement (PMC6862964)
Supplement: Supp_Table1.pdf [file Supp_Table1.pdf]

## Supplementary Data

SUPPLEMENTARY TABLE S1. PROPORTIONS OF PARTICIPANTS MEETING DEFICIT CRITERIA FOR EACH VARIABLE COMPRISING THE FRAILTY INDEX ACROSS HIV/METHAMPHETAMINE GROUPS

| <i>Frailty index variables</i> | A<br>HIV-/MA- (n=91) | B<br>HIV+/MA- (n=72) | C<br>HIV+/MA+ (n=43) | p              | <i>Pairwise comparisons</i> |
|--------------------------------|----------------------|----------------------|----------------------|----------------|-----------------------------|
| BMI                            | 65 (71%)             | 48 (67%)             | 31 (72%)             | .76            |                             |
| Total cholesterol              | 26 (29%)             | 18 (25%)             | 8 (20%)              | .54            |                             |
| LDL                            | 60 (67%)             | 33 (46%)             | 20 (53%)             | <b>.02</b>     | A > B                       |
| HDL                            | 16 (18%)             | 21 (29%)             | 16 (40%)             | <b>.02</b>     | A < C                       |
| Triglycerides                  | 17 (19%)             | 28 (38%)             | 17 (43%)             | <b>&lt;.01</b> | A < B, C                    |
| White blood cell count         | 11 (12%)             | 7 (8%)               | 5 (12%)              | .85            |                             |
| Hemoglobin                     | 13 (15%)             | 16 (22%)             | 7 (17%)              | .46            |                             |
| Hepatitis C infection          | 0 (0%)               | 11 (15%)             | 11 (26%)             | <b>&lt;.01</b> | A < B < C                   |
| C-reactive protein             | 49 (55%)             | 41 (67%)             | 24 (63%)             | .30            |                             |
| AST                            | 16 (18%)             | 21 (29%)             | 14 (34%)             | .08            |                             |
| ALT                            | 14 (15%)             | 29 (40%)             | 20 (49%)             | <b>&lt;.01</b> | A < B, C                    |
| Alkaline phosphate             | 4 (4%)               | 5 (7%)               | 4 (10%)              | .50            |                             |
| Platelets                      | 1 (1%)               | 7 (10%)              | 3 (7%)               | <b>.03</b>     | A < B, C                    |
| Potassium                      | 1 (1%)               | 6 (8%)               | 2 (5%)               | .06            |                             |
| Bilirubin                      | 3 (3%)               | 7 (10%)              | 10 (24%)             | <b>&lt;.01</b> | A, B < C                    |
| Unemployment                   | 26 (28%)             | 48 (64%)             | 34 (79%)             | <b>&lt;.01</b> | A < B < C                   |
| Hypertension                   | 13 (14%)             | 34 (45%)             | 18 (42%)             | <b>&lt;.01</b> | A < B, C                    |
| Diabetes                       | 6 (7%)               | 10 (13%)             | 4 (9%)               | .33            |                             |
| Smoking                        | 10 (11%)             | 29 (39%)             | 24 (56%)             | <b>&lt;.01</b> | A < B < C                   |
| Hyperlipidemia                 | 16 (17%)             | 33 (44%)             | 16 (37%)             | <b>&lt;.01</b> | A < B, C                    |
| IL-6                           | 46 (50%)             | 28 (42%)             | 17 (44%)             | .60            |                             |
| MCP-1                          | 46 (50%)             | 49 (74%)             | 33 (85%)             | <b>&lt;.01</b> | A < B < C                   |
| sCD14                          | 46 (50%)             | 36 (55%)             | 27 (69%)             | .13            |                             |
| TNF-a                          | 46 (50%)             | 36 (55%)             | 34 (87%)             | <b>&lt;.01</b> | A, B < C                    |
| D-dimer                        | 46 (50%)             | 36 (55%)             | 20 (51%)             | .85            |                             |
| Current MDD                    | 0 (0%)               | 5 (7%)               | 8 (19%)              | <b>&lt;.01</b> | A < B < C                   |
| Lifetime MDD                   | 19 (21%)             | 34 (45%)             | 28 (65%)             | <b>&lt;.01</b> | A < B < C                   |

Values are presented as *N* (%); Groups were compared using chi-square likelihood ratio test, or Fisher's exact test when cell count was less than five; Pairwise comparisons were examined Bonferroni adjustments ( $\alpha=0.05/3=0.0167$ ); **bold** values represent *p*-values that are significant at  $<0.05$ .

Consistent with expectations, individuals in HIV+/MA+ and/or HIV+/MA- groups were more likely to meet deficit criteria for most (15 out of 27; 56%) variables compared to the control HIV-/MA- group. Significant stairstep patterns indicating additive effects of HIV and MA on likelihood of meeting deficit criteria were found for hepatitis C infection, unemployment, smoking, current MDD, lifetime MDD, and three inflammatory biomarkers: MCP-1 and TNF-a. While calculating the proportion of total deficits in a frailty index score is clinically useful for understanding total accumulated medical burden and vulnerability, a closer examination of individual components of the frailty index may lead to a greater understanding of specific pathophysiological mechanisms underlying the association between frailty and comorbid HIV and lifetime MA use disorder. Results from the current supplemental analysis support the role of a wide range mechanisms, including coinfections, metabolic factors, behavioral/psychiatric factors, and inflammation.

ALT, alanine transaminase; AST, aspartate transaminase; BMI, body mass index; HDL, high-density lipoprotein; IL-6, interleukin-6; LDL, low-density lipoprotein; MA, methamphetamine; MCP-1, monocyte chemoattractant protein 1; MDD, major depressive disorder; sCD14, soluble CD14; TNF-a, tumor necrosis factor alpha.
